# Supplementary material
Source: publisher figshare collection journal article supplement (https://frontiersin.figshare.com/ndownloader/files/34089818)
Supplement: Supplementary file [file 34089818]

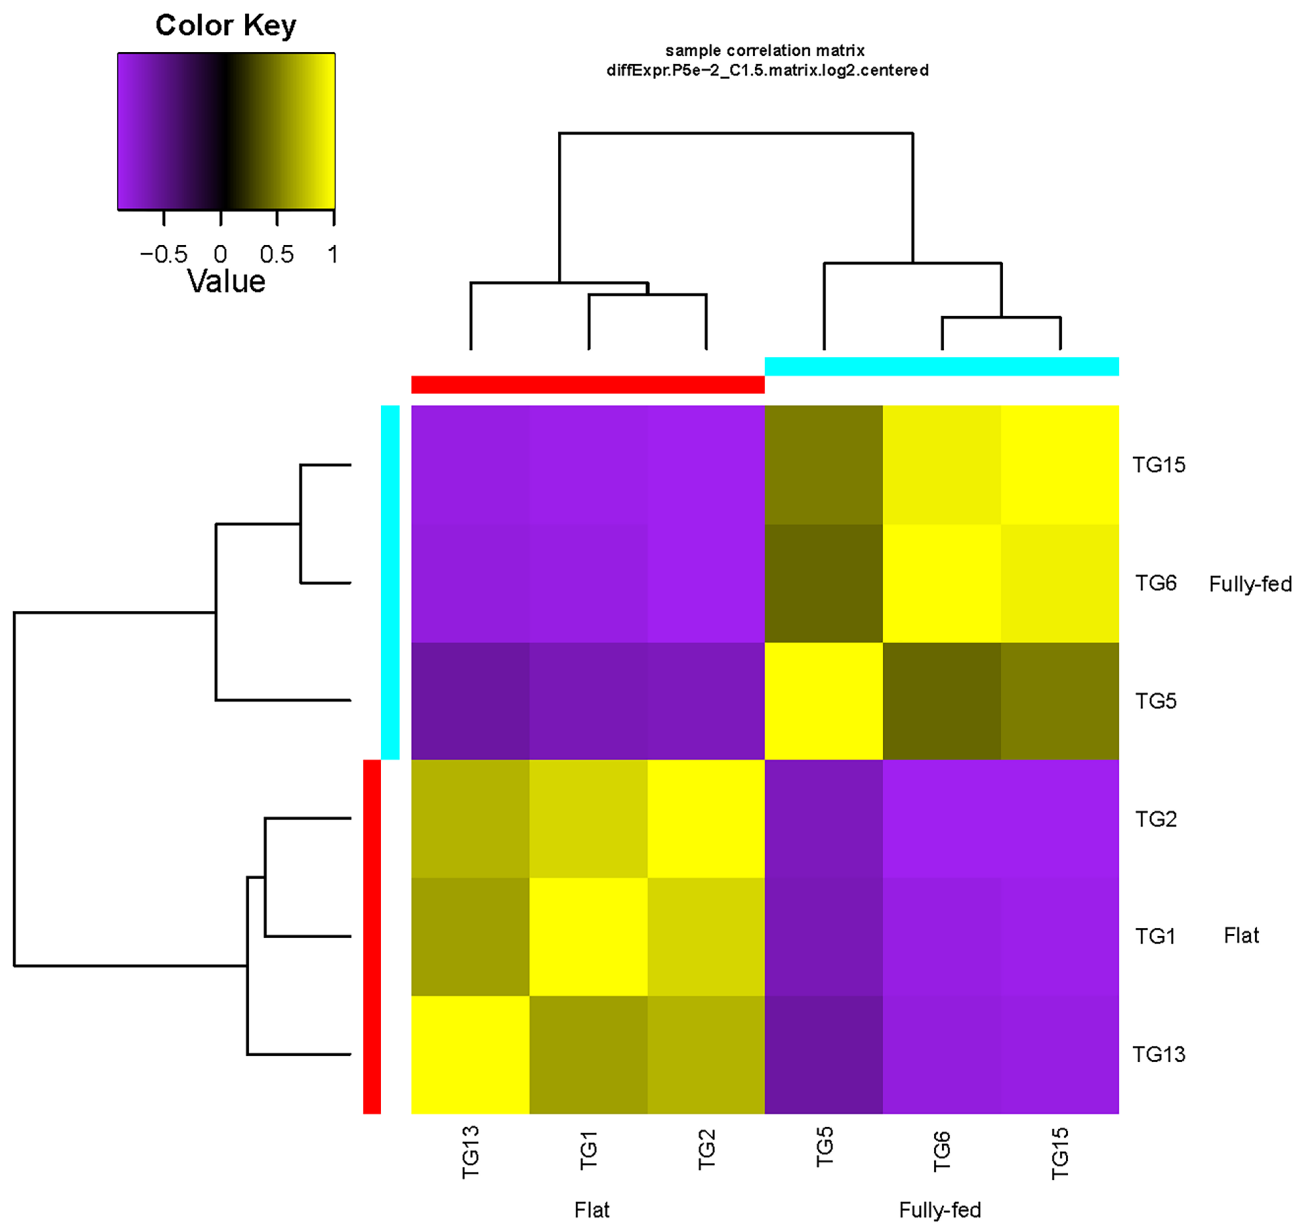

**Figure S1.** RNAseq analysis of tick gene transcripts detected in pools of flat and fully-fed *Ixodes persulcatus* ticks removed from human patients at Mudanjiang Forestry Central Hospital in Heilongjiang Province, China. Heatmap with clusters showing the Pearson correlation matrix for pairwise sample comparisons of differentially-expressed genes in flat (pools TG1, TG2, and TG13) and fully-fed (pools TG5, TG6, and TG15) ticks.

**A**

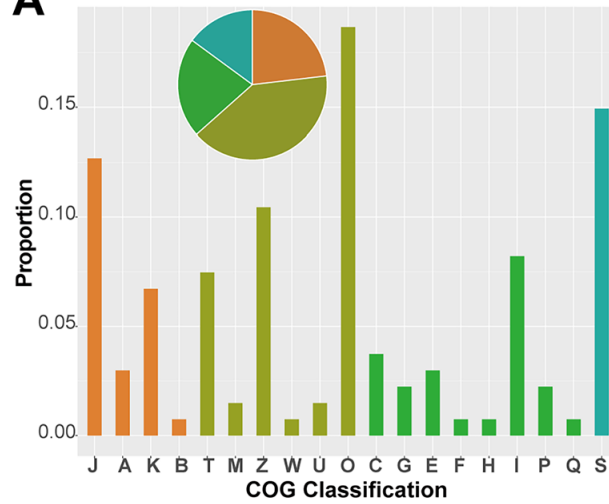

**B**

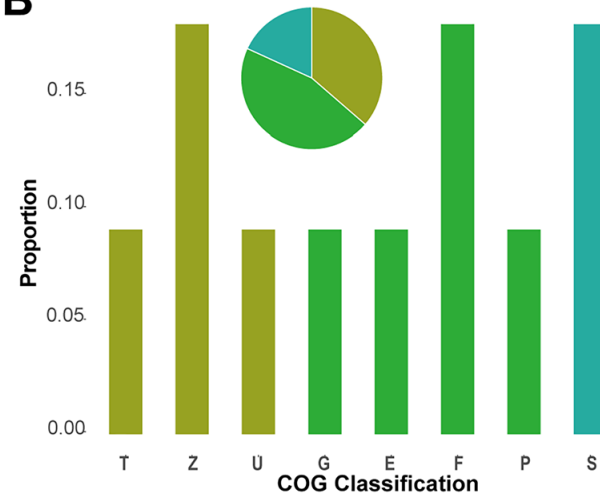

**CELLULAR PROCESSES AND SIGNALING**  
 [T] Signal transduction mechanisms  
 [M] Cell wall/membrane/envelope biogenesis  
 [Z] Cytoskeleton  
 [W] Extracellular structures  
 [U] Intracellular trafficking, secretion, and vesicular transport  
 [O] Posttranslational modification, protein turnover, chaperones

**INFORMATION STORAGE AND PROCESSING**  
 [J] Translation, ribosomal structure and biogenesis  
 [A] RNA processing and modification  
 [K] Transcription  
 [B] Chromatin structure and dynamics

**POORLY CHARACTERIZED**  
 [S] Function unknown

**METABOLISM**  
 [C] Energy production and conversion  
 [G] Carbohydrate transport and metabolism  
 [E] Amino acid transport and metabolism  
 [F] Nucleotide transport and metabolism  
 [H] Coenzyme transport and metabolism  
 [I] Lipid transport and metabolism  
 [P] Inorganic ion transport and metabolism  
 [Q] Secondary metabolites biosynthesis, transport and catabolism

**Figure S2.** RNAseq comparison of tick gene transcripts detected in pools of flat and fully-fed *Ixodes persulcatus* ticks removed from human patients at Mudanjiang Forestry Central Hospital in Heilongjiang Province, China. Taxonomic classification of differentially-expressed genes with similar expression patterns based on the Clusters of Orthologous Groups (COG) database (A) COG classification of genes up-regulated in fed versus unfed ticks; (B) COG classification of genes down-regulated in fed versus unfed ticks.
